# Supplementary material for: The effect of electric field on hydrogen storage for B/N-codoped graphyne
Source: Royal Society of Chemistry journal article supplement (doi:10.1039/c4ra07761j), 2014-01-01
Supplement: c4ra07761j1.pdf [file c4ra07761j1.pdf]

## Supporting Information

### The effect of electric field on hydrogen storage for B/N-codoped graphyne

Lihong Zhang<sup>a</sup>, Ning Wang<sup>a</sup>, Shengli Zhang<sup>b</sup>, Shiping Huang<sup>\*a</sup>

<sup>a</sup>State Key Laboratory of Organic-Inorganic Composites, Beijing University of Chemical Technology, Beijing 100029, China

<sup>b</sup>School of Materials Science and Engineering, Nanjing University of Science and Technology, Nanjing, Jiangsu, 210094, China

---

\* Corresponding author: Fax: +86-10-64427616 E-mail: [huangsp@mail.buct.edu.cn](mailto:huangsp@mail.buct.edu.cn)

(S. Huang)

**Table S1** The total energy of H<sub>2</sub> absorbed B/C/N sheet without dispersion correction ( $E_0$ ), dispersion correction ( $E_{\text{disp}}$ ), BSSE correction ( $E_{\text{BSSE}}$ ), and the total energy of H<sub>2</sub> absorbed B/C/N sheet with dispersion and BSSE corrections ( $E_{\text{total}}$ ) for single H<sub>2</sub> adsorption on different site of N<sub>b</sub>B<sub>f</sub> doped graphyne.

| <b>Adsorption sites</b> | <b><math>E_0</math>(eV)</b> | <b><math>E_{\text{disp}}</math>(eV)</b> | <b><math>E_{\text{BSSE}}</math>(eV)</b> | <b><math>E_{\text{total}}</math>(eV)</b> |
|-------------------------|-----------------------------|-----------------------------------------|-----------------------------------------|------------------------------------------|
| bighollow               | -49449.32                   | -2.71                                   | -0.0077                                 | -49452.03                                |
| smallhollow             | -49449.26                   | -2.60                                   | -0.0019                                 | -49451.87                                |
| top1                    | -49449.26                   | -2.62                                   | -0.0078                                 | -49451.89                                |
| top2                    | -49449.26                   | -2.63                                   | -0.0064                                 | -49451.90                                |
| top3                    | -49449.26                   | -2.64                                   | -0.0090                                 | -49451.91                                |
| top4                    | -49449.27                   | -2.64                                   | -0.0076                                 | -49451.91                                |
| top5                    | -49449.28                   | -2.63                                   | -0.0066                                 | -49451.92                                |
| bridge1                 | -49449.27                   | -2.64                                   | -0.0058                                 | -49451.92                                |
| bridge2                 | -49449.26                   | -2.63                                   | -0.0074                                 | -49451.90                                |
| bridge3                 | -49449.26                   | -2.63                                   | -0.0061                                 | -49451.90                                |
| bridge4                 | -49449.26                   | -2.64                                   | -0.0054                                 | -49451.91                                |
| bridge5                 | -49449.26                   | -2.61                                   | -0.0057                                 | -49451.88                                |

**Table S2** The total energy of H<sub>2</sub> absorbed B/C/N sheet without dispersion correction ( $E_0$ ), dispersion correction ( $E_{\text{disp}}$ ), BSSE correction ( $E_{\text{BSSE}}$ ), and the total energy of H<sub>2</sub> absorbed B/C/N sheet with dispersion and BSSE corrections ( $E_{\text{total}}$ ) for single H<sub>2</sub> adsorption on N<sub>b</sub>B<sub>f</sub> doped graphyne with different electric field.

| <b>E-field(a.u.)</b> | <b><math>E_0</math>(eV)</b> | <b><math>E_{\text{disp}}</math>(eV)</b> | <b><math>E_{\text{BSSE}}</math>(eV)</b> | <b><math>E_{\text{total}}</math>(eV)</b> |
|----------------------|-----------------------------|-----------------------------------------|-----------------------------------------|------------------------------------------|
| 0                    | -49449.32                   | -2.71                                   | -0.0077                                 | -49452.03                                |
| 0.005                | -49449.37                   | -2.71                                   | -0.0094                                 | -49452.08                                |
| 0.01                 | -49449.52                   | -2.70                                   | -0.0090                                 | -49452.23                                |
| 0.015                | -49449.77                   | -2.71                                   | -0.0091                                 | -49452.48                                |
| 0.02                 | -49450.12                   | -2.70                                   | -0.0089                                 | -49452.83                                |
| 0.025                | -49450.57                   | -2.66                                   | -0.0074                                 | -49453.23                                |
| 0.03                 | -49451.15                   | -2.64                                   | -0.0065                                 | -49453.79                                |
| 0.035                | -49451.87                   | -2.62                                   | -0.0064                                 | -49454.50                                |
